# Supplementary material for: Characterization of feline nonsteroidal anti-inflammatory drug activated gene-1 (fNAG-1) and its protective function in kidney cells
Source: Springer Nature journal article supplement (doi:10.1186/s12917-025-04781-1), 2025-05-21

# Supplementary information

**Supplementary Figure 1.** RT-PCR results of human NAG1 (Product size = 169 bp) and those of their GAPDH (product size = 453 bp) in 293T cell line.

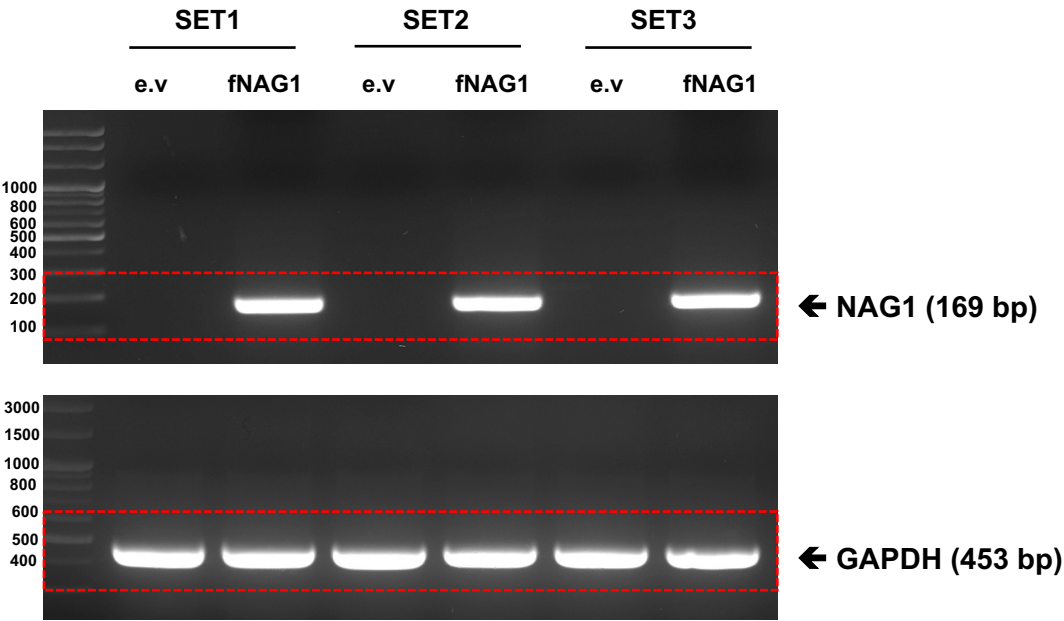

**Supplementary Figure 2.** RT-PCR results of feline NAG1 (Product size = 678 bp) and those of their GAPDH (product size = 683 bp) in CRFK cell line.

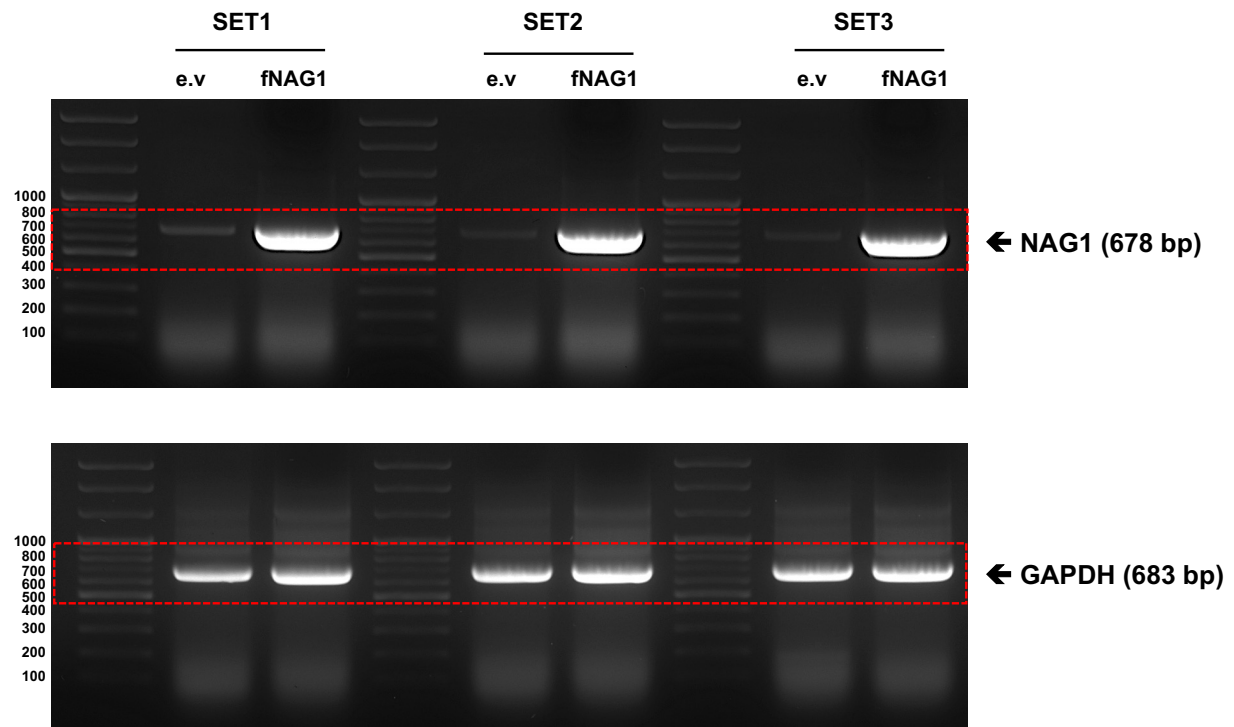

**Supplementary Figure 3.** Western blot results of Bax (MW = 20 kDa) and those of their GAPDH (MW = 36 kDa)

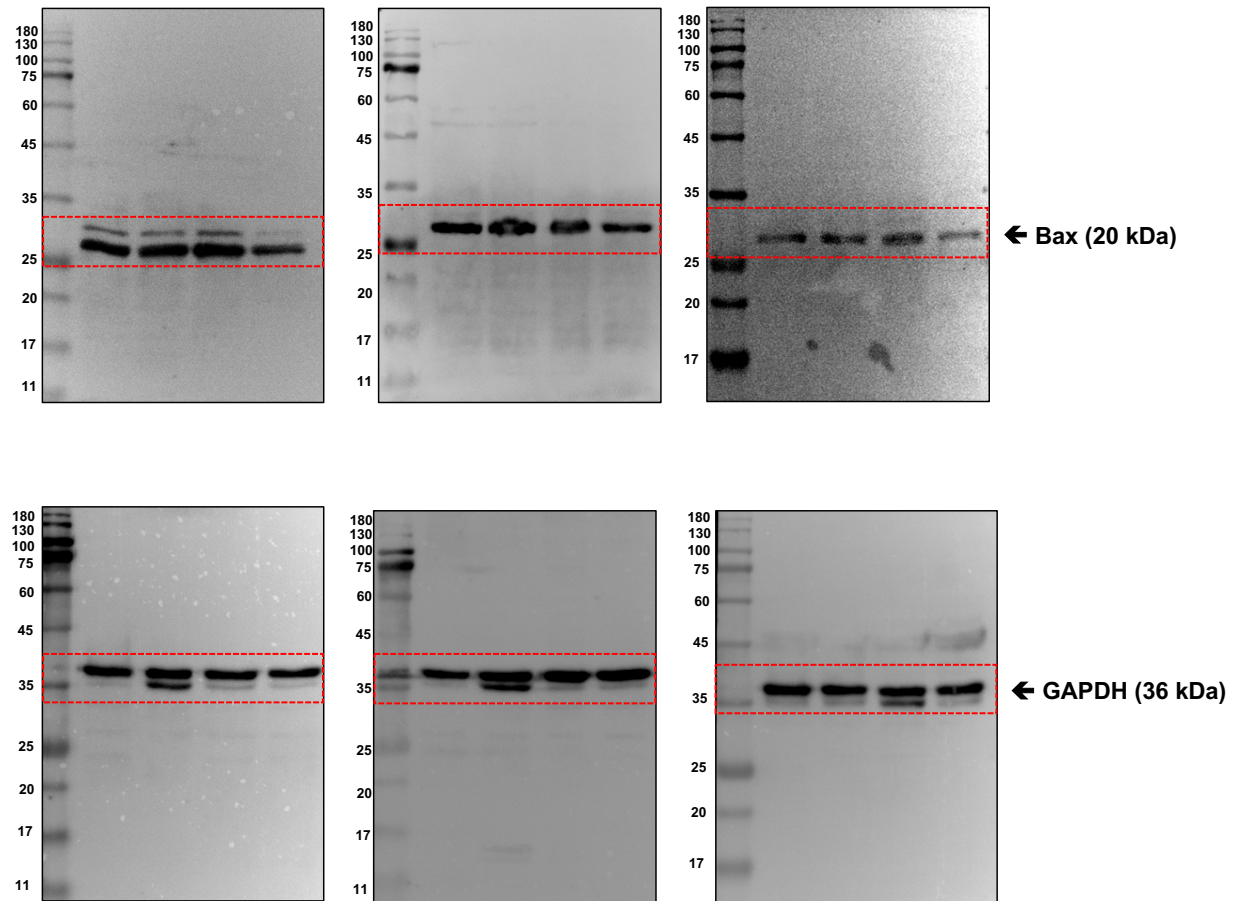

Supplement: MOESM1 [file 12917_2025_4781_MOESM1_ESM.pdf]
